# Supplementary material for: Poverty eradication in a carbon constrained world
Source: PubMed Central journal article supplement (PMC5783954; doi:10.1038/s41467-017-00919-4), 2017-10-24
Supplement: 41467_2017_919_MOESM1_ESM.pdf [file 41467_2017_919_MOESM1_ESM.pdf]

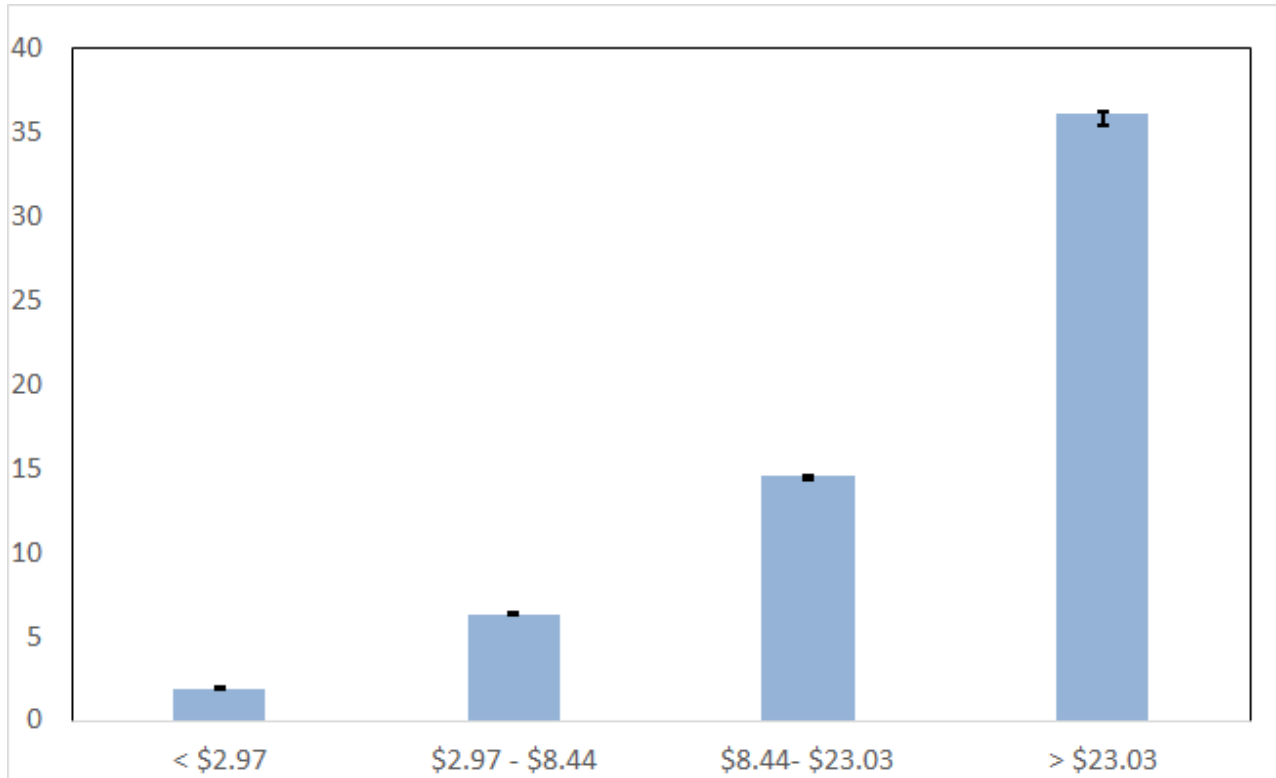

**Supplementary Figure 2:** Uncertainty analysis for per capita carbon footprint of four household groups

### Supplementary tables

**Supplementary Table 1:** Average share and standard deviation of main consumption items for extreme poverty and low expenditure household groups

|                       | Extreme Poverty              |      | Low Expenditure              |      |
|-----------------------|------------------------------|------|------------------------------|------|
|                       | Average share of consumption | SD   | Average share of consumption | SD   |
| Food and Beverages    | 0.60                         | 0.10 | 0.58                         | 0.10 |
| Clothing and Footwear | 0.06                         | 0.02 | 0.06                         | 0.03 |
| Housing               | 0.08                         | 0.06 | 0.09                         | 0.07 |

*The table shows the average and standard deviation for three major expenditure categories showing that for the extremely poor (less than \$1.9) and the less than \$2.97 category the three consumption items account for about three quarters of their household budget across the 90 poorest countries.*
