# Supplementary material for: Poverty eradication in a carbon constrained world
Source: PubMed Central journal article supplement (PMC5783954; doi:10.1038/s41467-017-00919-4), 2017-10-24
Supplement: 41467_2017_919_MOESM3_ESM.pdf [file 41467_2017_919_MOESM3_ESM.pdf]

## **Description of Additional Supplementary Files**

File Name: Supplementary Data 1

Description: Bridge Matrices
